# Supplementary material
Source: publisher figshare collection journal article supplement (https://acs.figshare.com/ndownloader/files/4204132)
Supplement: Supplementary file 1 [file 4204132]

# **Molecular Mechanism of the Effects of Salt and pH on the Affinity between Protein A and Human Immunoglobulin G1 Revealed by Molecular Simulations**

**Bo Huang, Fu-Feng Liu\*, Xiao-Yan Dong, and Yan Sun\***

*Department of Biological Engineering and Key Laboratory of Systems*

*Bioengineering of the Ministry of Education, School of Chemical Engineering and*

*Technology, Tianjin University, Tianjin 300072, China*

**Supporting Information**

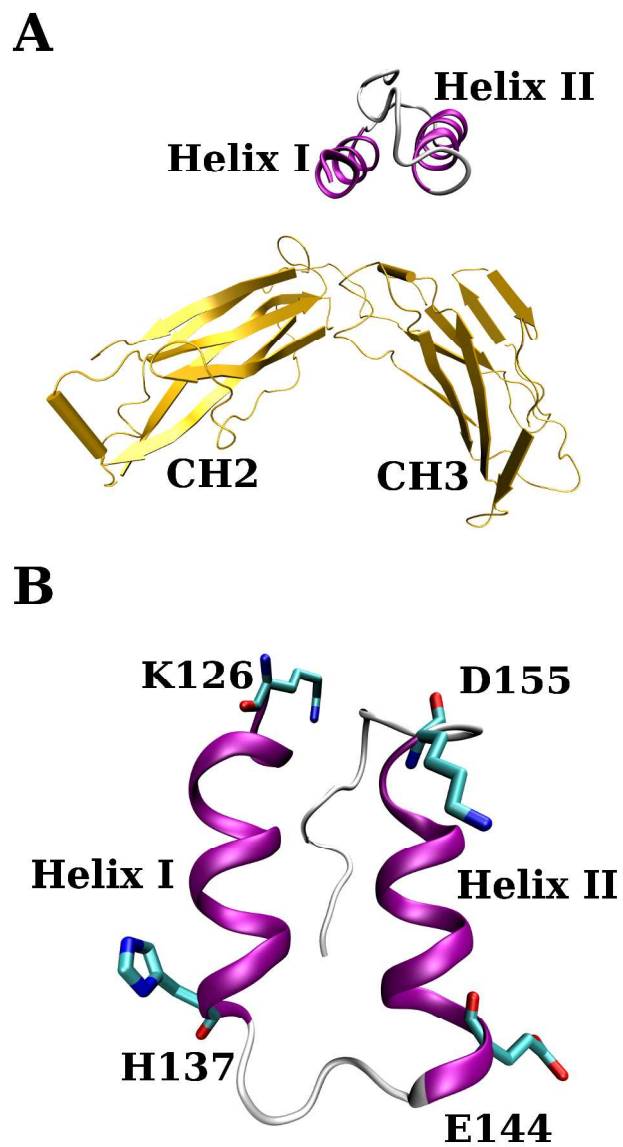

**Figure S1.** (A) Initial conformation of the SpA-hIgG1 complex. (B) Structure of the B domain of SpA.

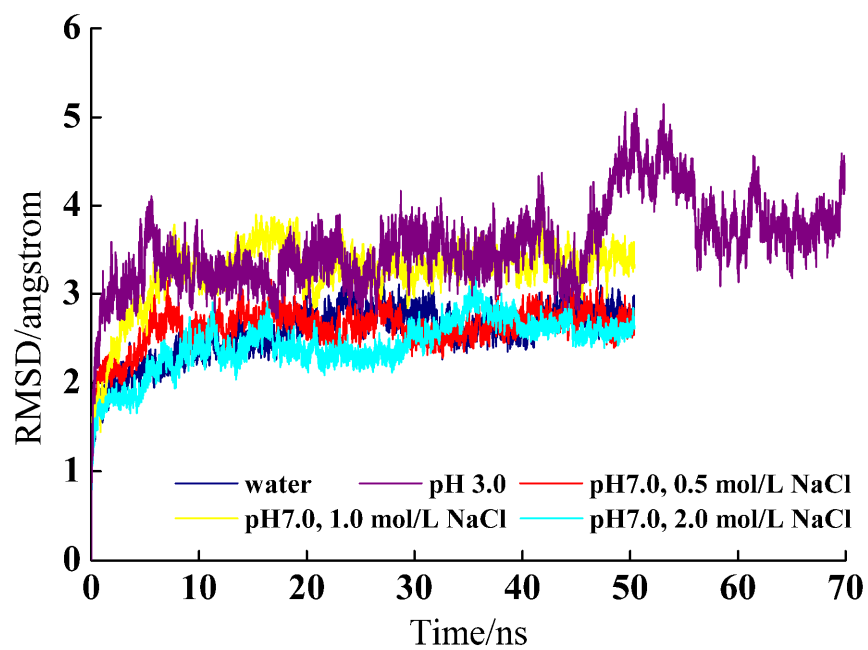

**Figure S2.** RMSD profiles of the six MD systems, calculated based on heavy atoms of SpA.

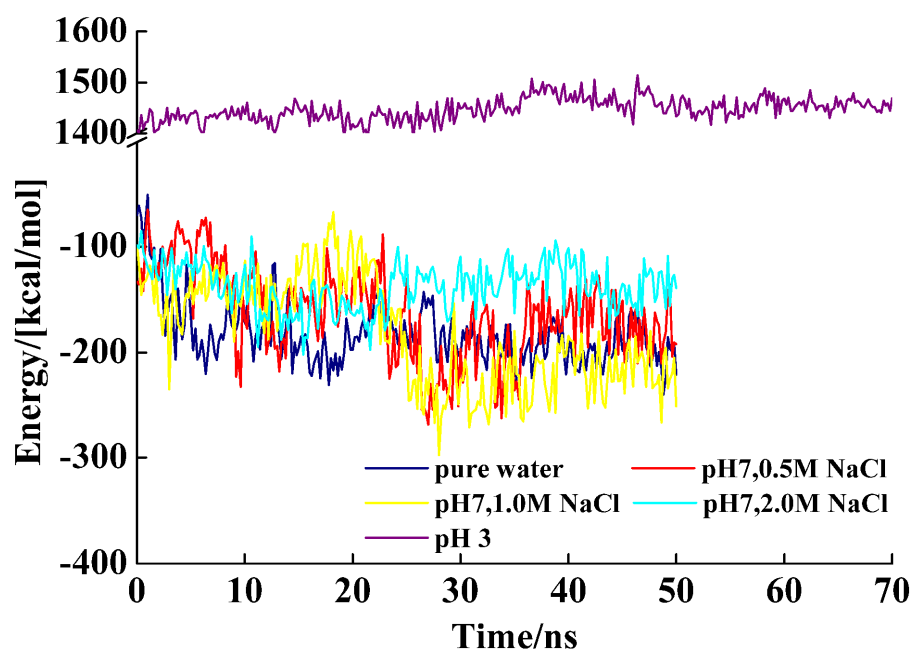

**Figure S3.** Time evolutions of the intermolecular potential energy between SpA and hIgG1 in different solutions.
